## Nifedipine or Verapamil Counteracts Hypertension in Gravid Ewes

Mark C. Norris, M.D.,\* James C. Rose, Ph.D.,† David M. Dewan, M.D.‡

Hypertension frequently complicates endotracheal intubation in the severely preeclamptic parturient. The calcium entry-blocking drugs nifedipine (N) and verapamil (V) are effective antihypertensive agents in nonpregnant patients. The authors studied the maternal and fetal hemodynamic effects of these drugs in chronically instrumented gravid ewes made hypertensive with an infusion of norepinephrine (NE). Initially NE was infused to increase maternal mean arterial pressure (MAP) by 20%. The NE infusion was continued and either N, 2 mg, or V, 10 mg, was administered intravenously. MAP decreased promptly to control values following both drugs. Maternal heart rate (MHR) decreased significantly following NE infusion. MHR returned to control values following V administration, and increased significantly above control following N administration. Uterine blood flow decreased 50–60% during NE infusion, and there was no further change following either N or V. Fetal hemodynamics were unchanged throughout the study. These results suggest that both N and V may be effective antihypertensive agents in the parturient. V did not produce maternal tachycardia and may be the preferable drug. (Key words: Anesthesia: obstetrics. Complications: preeclampsia. Pharmacology: nifedipine verapamil.)

ENDOTRACHEAL INTUBATION in parturients with severe preeclampsia often markedly increases maternal blood pressure (BP), which may cause pulmonary edema and subarachnoid hemorrhage.<sup>1</sup> Numerous drugs have been used to control this hypertension; however, none has proven ideal. The calcium entry-blocking drugs, nifedipine and verapamil, are effective antihypertensive agents in nonpregnant patients<sup>2–4</sup> and may be useful in the treatment of preeclampsia.<sup>5</sup> Any decrease in maternal BP is accompanied by a decrease in uterine perfusion pressure, which may diminish uterine blood flow (UBF) and, consequently, fetal blood supply. Placental function is often impaired in severe preeclamptics, and any decrease in blood supply to an already compromised fetus can be detrimental. We investigated the maternal and fetal hemo-

dynamic response to nifedipine or verapamil, in ewes made hypertensive by infusion of norepinephrine (NE).

### Methods

We studied eight gravid ewes, weighing  $62.6 \pm 3.5$  kg (mean  $\pm$  SEM), of 110–130 days gestation (term: 145 days). Following cannulation of a jugular vein, anesthesia was induced with pentobarbital (6 mg/kg) and maintained with halothane (1–2%) in oxygen by nasal insufflation. Through a midline abdominal incision, we exposed the uterus and extracted a fetal hind limb through a hysterotomy. Catheters were placed in a fetal tibial artery and a saphenous vein, and a pressure catheter was placed in the amniotic cavity, after which the uterine and abdominal incisions were closed. Through a groin incision, catheters were inserted in a maternal mammary artery and vein, and an electromagnetic flow probe was placed around a uterine artery. All catheters were tunneled subcutaneously and exteriorized through a flank incision. Finally, we placed a zero flow-occlusion loop<sup>6</sup> around the aorta. All animals rested at least 3 days before being studied.

On the day of the study, the sheep were placed in a quiet room with free access to food and water. Maternal mean arterial blood pressure (MAP), maternal heart rate (MHR), UBF, fetal mean arterial pressure (FAP), and fetal heart rate (FHR) were continuously monitored. Following a stable control period, an infusion of NE was begun in a dose sufficient to increase MAP by 20% ( $1.27 \pm 0.19 \mu\text{g} \cdot \text{kg}^{-1} \cdot \text{min}^{-1}$ ). The NE infusion was continued at this dose throughout the study period. When all variables had again stabilized for 5–10 min, nifedipine (2 mg,  $n = 7$ ) or verapamil (10 mg,  $n = 6$ ) was administered by slow intravenous injection and all variables were monitored for 20 min. Maternal and fetal arterial blood gas analysis was performed during the control period, during NE hypertension, and 5 and 20 min following nifedipine or verapamil administration. At least 20 h elapsed between studies in a single animal.

Both drugs were given to five of the animals. The first two ewes studied received only nifedipine; the last ewe only verapamil. Although the order of administration was not formally randomized, three ewes received nifedipine first, while two received verapamil first. No ewe or fetus died within 12 h of any study.

All data are expressed as mean  $\pm$  SEM. We used a

\* Clinical Assistant Professor of Anesthesiology, Department of Anesthesiology, Thomas Jefferson University.

† Assistant Professor of Physiology, Department of Physiology, Wake Forest University.

‡ Associate Professor of Anesthesiology, Department of Anesthesiology, Wake Forest University.

Received from the Departments of Physiology and Anesthesiology, Wake Forest University, Winston-Salem, North Carolina. Accepted for publication March 28, 1986. Presented at the Society of Obstetric Anesthesia and Perinatology, May 10, 1985, Washington, D.C.

Address reprint requests to Dr. Norris: Department of Anesthesiology, Thomas Jefferson University, 111 S. 11th Street, Philadelphia, Pennsylvania 19107.



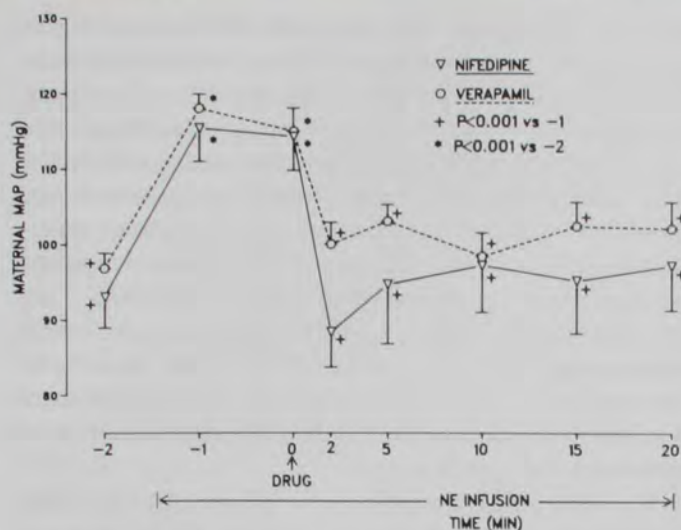

FIG. 1. Maternal blood pressure. -2 represents the baseline value. Norepinephrine (NE) infusion was begun and a stable 20% increase in MAP was achieved at point -1. Injection of either drug at time 0 returned MAP to control values at 2 min.

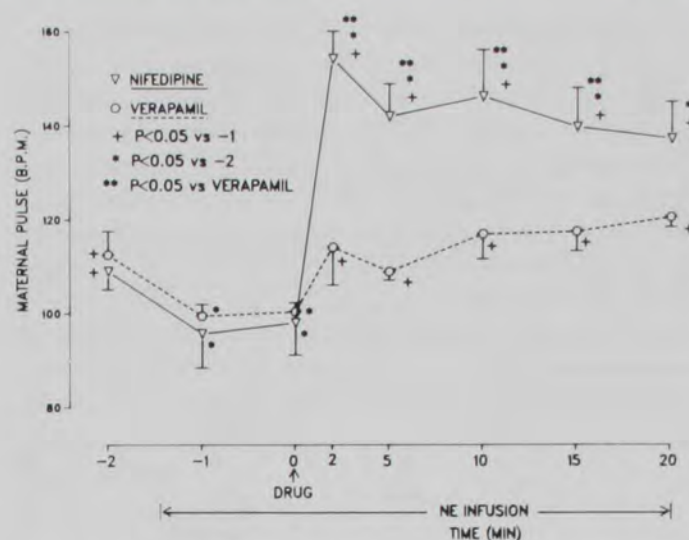

FIG. 2. Maternal heart rate (MHR). Time sequence as in figure 1. Norepinephrine (NE)-induced hypertension decreases MHR, following verapamil, MHR returns to baseline values, following nifedipine, a significant maternal tachycardia ensues.

multiple analysis of variance for repeated measures<sup>7</sup> to analyze our data and considered a  $P < 0.05$  significant.

### Results

All sheep tolerated the protocol, and there were no deaths within 12 h of any study. NE infusion at  $77.3 \pm 10.0 \mu\text{g} \cdot \text{min}^{-1}$  ( $1.27 \pm 0.19 \mu\text{g} \cdot \text{kg}^{-1} \cdot \text{min}^{-1}$ ) increased MAP 20% (fig. 1). MAP returned promptly (within 2 min) to control values following injection of either nifedipine or verapamil. (fig. 1) There were no further changes in MAP during the remainder of the experiment. MHR (fig. 2) decreased significantly ( $P < 0.05$ ) during NE hypertension. Nifedipine was followed by a significant maternal tachycardia ( $P < 0.05$  vs. control,  $P < 0.05$  vs. verapamil), which persisted throughout the study period. In contrast, following verapamil administration, MHR returned only to control values. FHR and FAP were unchanged throughout the study. UBF (fig. 3) decreased 50–60% during NE hypertension and did not change further following either drug. Maternal arterial blood gases were unchanged throughout the protocol. However, fetal  $\text{PaO}_2$  and  $\text{pH}$  decreased significantly during NE hypertension. Fetal  $\text{PaO}_2$  improved slightly but significantly ( $P < 0.05$ ) by 20 min following nifedipine or verapamil (fig. 4).

### Discussion

Close control of maternal BP during laryngoscopy and intubation in the severely preeclamptic patient is recommended to prevent the significant morbidity that can

occur.<sup>1</sup> An agent that rapidly decreases maternal BP without adversely affecting an already compromised fetus would be useful in this situation. An ideal drug would be potent, rapidly acting, controllable, and without significant maternal or fetal side effects. None of the currently used drugs fulfills all of these criteria.

Hydralazine is frequently used to treat the hypertension of preeclampsia. It has no deleterious effects on UBF or fetal acid-base status unless BP decreases excessively.<sup>8</sup> However, its slow onset and long duration of action make accurate, rapid changes in MAP difficult.

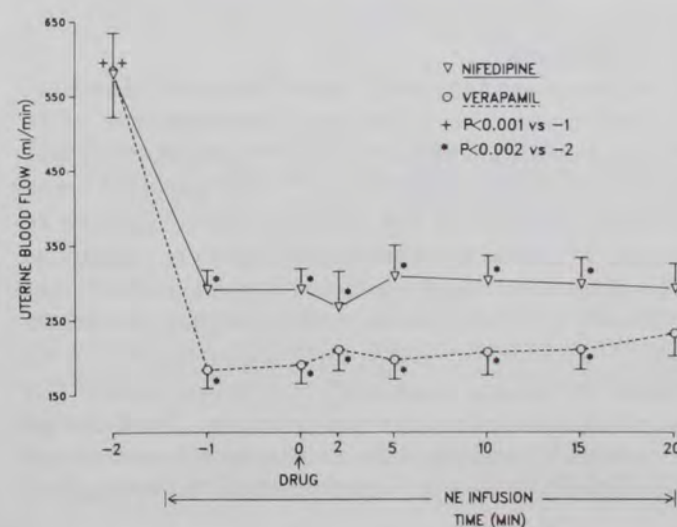

FIG. 3. Uterine blood flow (UBF). Time sequence as in figure 1. Norepinephrine (NE) reduces UBF. Neither drug causes any further change to UBF.



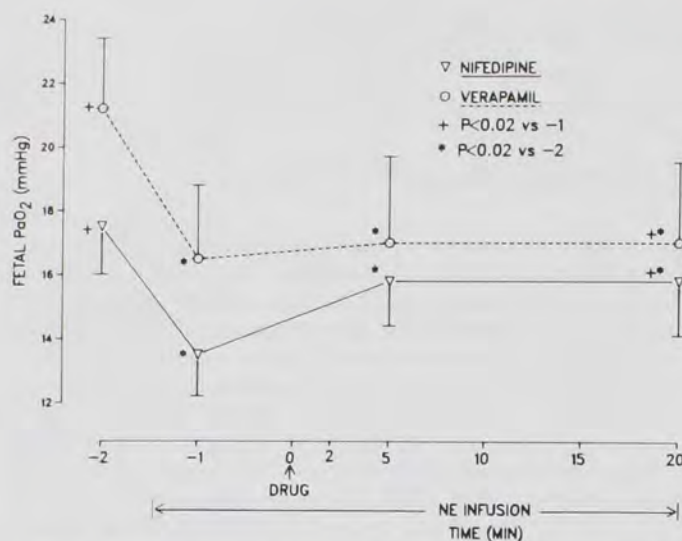

FIG. 4. Fetal  $\text{PaO}_2$ . Time sequence as in figure 1. Norepinephrine (NE) infusion decreases fetal  $\text{PaO}_2$ . Slight improvement occurs by 20 min after either drug.

Nitroglycerin also effectively controls BP during induction of general anesthesia in the severely preeclamptic patient.<sup>9</sup> It has a rapid onset and short duration of action and does not appear to adversely affect UBF.<sup>10</sup> However, it is primarily a venodilator and although effective in our hands, it may not be potent enough to control the maternal response to laryngoscopy and intubation in some preeclamptic patients.<sup>§</sup>

Nitroprusside is a very effective antihypertensive agent in the nonpregnant patient. Its use in the parturient has been limited by concerns about cyanide toxicity.<sup>11</sup> Considerable reflex maternal tachycardia also occurs.<sup>12</sup> Additionally, nitroprusside is extremely potent and may cause excessive hypotension even during careful titration. Significant rebound hypertension may occur when the drug is discontinued.<sup>13</sup>

Although used primarily in the treatment of tachyarrhythmias and coronary artery disease, calcium entry-blocking drugs are effective in the management of both acute and chronic hypertension.<sup>14</sup> The maternal hemodynamic responses in this study are similar to those reported by others in nonpregnant hypertensive patients. The onset of action of nifedipine is rapid (within 5 min) following both intravenous and sublingual administration,<sup>15,2</sup> and the decrease in MAP is accompanied by significant increases in heart rate<sup>14</sup> and cardiac output.<sup>2</sup> Our gravid ewes responded in a similar fashion. These changes are probably caused by a direct relaxant effect on peripheral arterioles and a reflex increase in sympathetic

tone.<sup>16,17</sup> Verapamil also decreases BP in hypertensive humans, but in contrast to nifedipine, heart rate and cardiac output do not increase.<sup>18</sup> Its primary action is also as a vasodilator but its intrinsic negative inotropic and chronotropic properties inhibit reflex cardiac effects.<sup>13,14</sup> The stable heart rate in our animals is consistent with these findings. Thus, calcium entry-blocking drugs appear to be an alternative to the other antihypertensive agents used to control maternal response to intubation. They are more rapidly acting than hydralazine, more potent than nitroglycerin, and, unlike nitroprusside, do not produce toxic metabolites. In our animals, they did not cause excessive hypotension or rebound hypertension, which is consistent with previous work.<sup>13</sup>

We were concerned about the effects of these drugs on UBF. *In vitro* studies show that both nifedipine and verapamil inhibit NE-induced contractions of human arteries.<sup>19</sup> Murad *et al.* reported that verapamil decreases UBF 10–25% in normotensive gravid ewes and attributed this to an 11% decrease in MAP and reduced uterine perfusion pressure.<sup>20</sup> In nonpregnant rats, nifedipine increases UBF, but in estradiol-treated rats whose uterine arteries are maximally dilated, (a situation analogous to pregnancy), nifedipine does not affect UBF.<sup>21</sup> Nifedipine also appears to have no deleterious effects on UBF when given to normotensive pregnant ewes.<sup>22</sup> In this study, UBF did not change, despite a 20% decrease in uterine perfusion pressure following nifedipine or verapamil administration. We postulate that although nifedipine and verapamil did not completely correct the NE-induced uterine vasoconstriction, these drugs do have some direct vasodilating effect on the uterine artery, which compensates for the decrease in uterine perfusion pressure, and UBF is maintained but not improved.

There are few data available concerning the fetal effects of these drugs. Verapamil crosses the placenta.<sup>23,24</sup> Neither our work nor that of Murad *et al.*<sup>23</sup> indicates any effect on FAP, FHR, or fetal acid–base status. Verapamil has been used to treat maternal tachyarrhythmias without adversely affecting the fetus.<sup>25</sup> Similarly, nifedipine has been used as a tocolytic agent without apparent harmful fetal effects.<sup>26</sup> We have studied nifedipine in normotensive gravid ewes and saw no changes in FAP or fetal acid–base status.<sup>22</sup>

In the clinical setting, we would also be concerned with the effects of these drugs on uterine activity. Uterine contractility depends on calcium flux through cell membranes.<sup>27</sup> Calcium entry-blocking drugs inhibit calcium movement into and possibly within cells.<sup>28,29</sup> Nifedipine inhibits spontaneous uterine activity<sup>30</sup> and also contractions induced by oxytocin,<sup>28</sup> methylergonovine,<sup>30</sup> and prostaglandin  $\text{F}_{2\alpha}$ .<sup>31,32</sup> Verapamil also inhibits spontaneous uterine activity, but less than nifedipine.<sup>33</sup> This

§ Longmire S, Jones M, Tessen J, Cotton D, Dorman K, Joyce T III: Hemodynamic effects of nitroglycerin in pregnancy induced hypertension. SOAP Abstract, May 10, 1985, p 17.



could increase blood loss at delivery. However, in a clinical study by Forman *et al.*,<sup>30</sup> nifedipine was given immediately postpartum and no increase in uterine size or bleeding was noted. Although our animals were not in labor, we saw no changes in amniotic fluid pressure during the experiment. Further clinical studies are needed in this area.

Preeclampsia is a systemic disease with generalized arteriolar vasospasm<sup>34</sup> and a hyperdynamic myocardial state.<sup>35,36</sup> Increases in both peripheral vascular resistance and cardiac output may contribute to the increased BP. The antihypertensive agents, such as hydralazine, that are commonly used in the treatment of preeclampsia are primarily arteriolar dilators, and cardiac output normally increases both as a consequence of decreased afterload as well as increased heart rate. A more logical drug may be one with negative, chronotropic, inotropic, and vasodilator properties such as verapamil. Verapamil has been used in patients with both acute and chronic congestive heart failure, and its potent afterload-reducing effects compensated for any intrinsic cardiac depression and actually improved hemodynamics and cardiac function.<sup>37,38</sup>

An issue that may be raised in regard to this study is whether the hemodynamic responses seen were truly the effects of nifedipine or verapamil or the result of tachyphylaxis or maternal compensatory responses to the NE-induced hypertension. There are several points in favor of the initial response being a specific drug effect. First, there was no evidence of maternal tachyphylaxis or other compensatory response in the time between achieving a 20% increase in MAP and the administration of nifedipine and verapamil. Second, this stable hypertensive period was of variable duration and always terminated promptly with drug administration. Third, the hemodynamic changes that occurred with drug administration are consistent with those seen in other animal and human studies.<sup>2-4,13-17,29,39</sup> Fourth, also, while the BP response was similar with both drugs, the heart rate response was different. It is highly unlikely that a given animal would respond differently to NE infusion on two different days. Finally, when the NE infusion was stopped at the end of each study, UBF always returned to baseline within a few minutes (M.C.N., unpublished observations), suggesting that the persistent decrease in UBF was due to the continuing NE infusion and not nifedipine or verapamil. Therefore, the initial hemodynamic changes are most probably drug-specific effects. However, there are changes at 20 min that may represent tachyphylaxis or maternal compensation. There is a slight improvement in UBF at 20 min. (This is statistically significant in the verapamil group when analyzed separately.) A similar delayed improvement has been reported following nitroprusside in the same animal model.<sup>12</sup> Similarly, the slight increase in fetal  $\text{PaO}_2$  at 20 min may be due to compensatory changes.

In conclusion, the calcium entry-blocking drugs, nifedipine and verapamil, rapidly and effectively decrease maternal BP in the hypertensive gravid ewe without producing deleterious effects on UBF or fetal acid-base status. Although we realize the limitations of basing clinical judgements on animal studies, we believe that the use of both of these drugs during the induction of general anesthesia in the preeclamptic patient should be investigated further. Interestingly, Zaret<sup>5</sup> has suggested using nifedipine in the chronic treatment of preeclampsia and Walters and Redman<sup>39</sup> have reported use in this circumstance. However, verapamil, with its absence of maternal tachycardia, may be the preferable drug for control of maternal hypertension.

## References

1. Hodgkinson R, Husain FJ, Hayashi RH: Systemic and pulmonary blood pressure during caesarean section in parturients with gestational hypertension. *Can Anaesth Soc J* 27:389-393, 1980
2. Guazzi M, Olivari MT, Polese A, Fiorentini C, Magrini F, Moruzzi P: Nifedipine, a new antihypertensive with rapid action. *Clin Pharmacol Ther* 22:528-532, 1977
3. Anavekar SN, Christophidis N, Louis WJ, Doyle AE: Verapamil in the treatment of hypertension. *J Cardiovasc Pharmacol* 3: 287-292, 1981
4. Lewis GRJ, Morley KD, Lewis BM, Bones PJ: The treatment of hypertension with verapamil. *NZ Med J* 87:351-354, 1978
5. Zaret GM: Possible treatment of preeclampsia with calcium channel blocking agents. *Med Hypotheses* 12:303-319, 1983
6. Greiss FC Jr: A mechanical zero reference for implanted flow meter systems. *J Appl Physiol* 17:177-178, 1962
7. Hull CH, Nie N (eds): *SPSS Update 7-9*. New York, McGraw-Hill, 1981
8. Ring G, Krames E, Shnider SM, Wallis KL, Levinson G: Comparison of nitroprusside and hydralazine in hypertensive pregnant ewes. *Obstet Gynecol* 50:598-602, 1977
9. Hood DD, Dewan DM, James FM III, Floyd HM, Bogard TD: The use of nitroglycerin in preventing the hypertensive response to tracheal intubation in severe preeclampsia. *ANESTHESIOLOGY* 63:329-332, 1985
10. Wheeler AS, James FM III, Meis PJ, Rose JC, Fishburne JI, Dewan DM, Urban RB, Greiss FC Jr: Effects of nitroglycerin and nitroprusside on the uterine vasculature of gravid ewes. *ANESTHESIOLOGY* 52:390-394, 1980
11. Naulty J, Cefalo RC, Lewis PE: Fetal toxicity of nitroprusside in the pregnant ewe. *Am J Obstet Gynecol* 139:708-711, 1981
12. Ellis SC, Wheeler AS, James FM III, Rose JC, Meis PJ, Shihabi Z, Greiss FC Jr, Urban RB: Fetal and maternal effects of sodium nitroprusside used to counteract hypertension in gravid ewes. *Am J Obstet Gynecol* 143:766-770, 1982
13. Oates HF, Stoker LM, Stoks GS: Verapamil as a hypotensive agent: A comparison, in the anesthetized rat, with hydralazine, diazoxide and nitroprusside. *Clin Exp Hypertens* 1:473-485, 1979
14. Singh BN, Hecht HS, Nademanee K, Chew CYC: Electrophysiologic and hemodynamic effects of slow channel blocking drugs. *Prog Cardiovasc Dis* 25:103-132, 1982
15. Kleinbloesem CH, van Brummelen P, van de Linde JA, Voogd



- PH, Breimer DP: Nifedipine kinetics and dynamics in healthy subjects. *Clin Pharmacol Ther* 35:742-749, 1984
16. Pederson OL, Christensen R, Ramsch NJ: Comparison of acute effects of nifedipine in normotensive and hypertensive man. *J Cardiovasc Pharmacol* 2:357-366, 1980
  17. Nakaya H, Schwartz A, Millard RW: Reflex chronotropic and inotropic effects of calcium channel-blocking agents in conscious dogs. *Circ Res* 52:302-311, 1983
  18. Seabra-Gomes R, Rickards A, Sutton R: Hemodynamic effects of verapamil and practolol in man. *Eur J Cardiol* 4:79-85, 1976
  19. Mikkelsen E, Andersson K-E, Pederson OL: The effects of nifedipine on isolated human peripheral vessels. *Pharmacol Toxicol (Copenh)* 43:291-298, 1978
  20. Murad SHN, Tabsh KMA, Shilyanski G, Kapur PA, Ma C, Lee C, Conklin KA: Effects of verapamil on uterine blood flow and maternal cardiovascular function in the awake pregnant ewe. *Anesth Analg* 64:7-10, 1985
  21. Sandaki B, Andersson K-E, Aronsen K-F, Ulmsten U: Effect of the calcium antagonist nifedipine on uterine blood flow in non-treated and oestradiol-treated rats. *Gynecol Obstet Invest* 9: 238-243, 1978
  22. Norris MC, Rose JC, Dewan DM: Maternal and fetal effects of nifedipine in the gravid ewe (abstract). *ANESTHESIOLOGY* 63: A430, 1985
  23. Murad SHN, Tabsh KMA, Conklin KA, Shilyanski G, Ziadlourad F, Kapur PA, Flacke WE: Verapamil: Placental transfer and effects on maternal and fetal hemodynamics and atrioventricular conduction in the pregnant ewe. *ANESTHESIOLOGY* 62: 49-53, 1985
  24. Wolff F, Breuker KH, Schlensker KH, Bolte A: Prenatal diagnosis of fetal heart rate abnormalities: With a contribution on the placental transfer of verapamil. *J Perinat Med* 8:203-208, 1980
  25. Klein V, Repke JT: Supraventricular tachycardia in pregnancy: Cardioversion with verapamil. *Obstet Gynecol* 63:16S-18S, 1984
  26. Ulmsten U, Andersson K-E, Wingerup L: Treatment of premature labor with the calcium antagonist nifedipine. *Arch Gynaecol* 229:1-5, 1980
  27. Haszar G: Biology and biochemistry of myometrial contractility and cervical maturation. *Semin Perinatol* 5:216-234, 1981
  28. Maigaard S, Forman A, Andersson K-E, Ulmsten U: Comparison of the effects of nicardipine and nifedipine on isolated human myometrium. *Gynecol Obstet Invest* 16:354-366, 1983
  29. Millard RW, Grupp G, Grupp IL, DiSlavo J, DePover A, Schwartz A: Chronotropic inotropic, and vasodilator actions of diltiazem, nifedipine and verapamil. *Circ Res (Suppl 1)* 52:29-39, 1983
  30. Forman A, Gandrup P, Andersson K-E, Ulmsten U: Effects of nifedipine on spontaneous and methylethylergometrine-induced activity post-partum. *Am J Obstet Gynecol* 144:442-448, 1982
  31. Forman A, Gandrup P, Andersson K-E, Ulmsten U: Effects of nifedipine on oxytocin and prostoglandin F<sub>2</sub>-induced activity in the post-partum uterus. *Am J Obstet Gynecol* 144:665-670, 1982
  32. Andersson K-E, Ingemarsson I, Ulmsten U, Wingerup L: Inhibition of prostoglandin-induced uterine activity by nifedipine. *Br J Obstet Gynaecol* 86:175-179, 1979
  33. Hahn DW, McGuire JL, Vanderhoof M, Ericson E, Pasquale SA: Evaluation of drugs for arrest or premature labor in a new animal model. *Am J Obstet Gynecol* 148:775-778, 1984
  34. James FM III: Pregnancy induced hypertension, *Obstetric Anesthesia: The Complicated Patient*. Edited by James FM III, Wheeler AS. Philadelphia, FA Davis, 1982, pp 249-253
  35. Rafferty TD, Berkowitz RL: Hemodynamics in patients with severe toxemia during labor and delivery. *Am J Obstet Gynecol* 138: 263-270, 1980
  36. Phelan JP, Yurth DA: Severe preeclampsia: Peripartum hemodynamic observations. *Am J Obstet Gynecol* 144:17-22, 1982
  37. Kopman EA: Intravenous verapamil to relieve pulmonary congestion in patients with mitral valve disease. *ANESTHESIOLOGY* 58:374-376, 1983
  38. Ferlinz J, Citron PD: Hemodynamic and myocardial performance characteristics after verapamil use in congestive heart failure. *Am J Cardiol* 51:1339-1345, 1983
  39. Walters BNJ, Redman CWG: Treatment of severe pregnancy-associated hypertension with the calcium antagonist nifedipine. *Br J Obstet Gynaecol* 91:330-336, 1984
